# Supplementary material for: Phosphoenolpyruvate Carboxykinase Maintains Glycolysis-driven Growth in Drosophila Tumors
Source: PubMed Central journal article supplement (PMC5599506; doi:10.1038/s41598-017-11613-2), 2017-09-14
Supplement: 41598_2017_11613_MOESM1_ESM.pdf [file 41598_2017_11613_MOESM1_ESM.pdf]

Phosphoenolpyruvate Carboxykinase Maintains Glycolysis-driven Growth in *Drosophila* Tumors.

Rashid Hussain, Zeeshan Shaukat, Mahwish Khan, Robert Saint and Stephen L. Gregory.

Supplementary Information.

Supplementary Figure 1

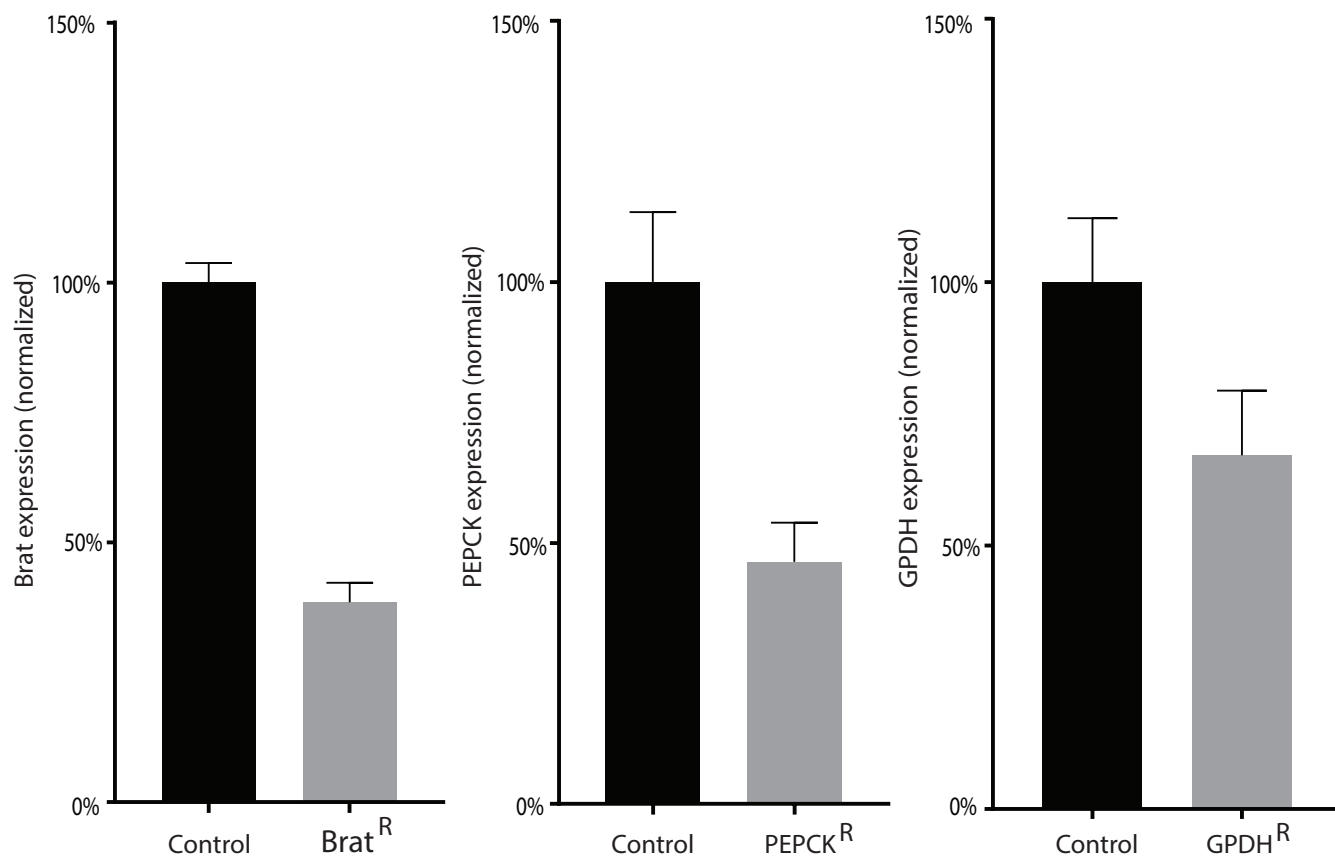

Supplementary Figure 2

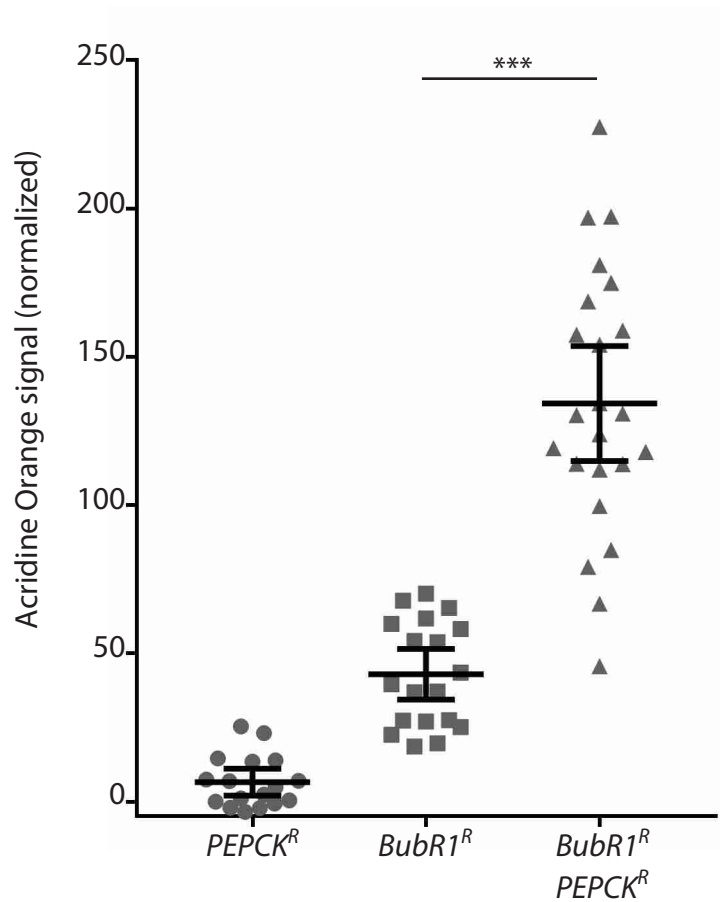

Effect of PEPCK depletion on cell death levels in *Drosophila* imaginal wing disc cells when CIN was induced by the depletion of BubR1. Depletion of BubR1 to induce CIN in the posterior half of *Drosophila* 3rd instar larval wing discs (*en>Gal4; UAS-BubR1-RNAi*) gave some cell death, which was strongly enhanced by co-depleting PEPCK (*en>Gal4; UAS-BubR1-RNAi; UAS-PEPCK-RNAi*). Error bars show 95% confidence intervals, \*\*\* indicates  $p < 0.001$  by unpaired t-test.

Supplementary figure 3

a

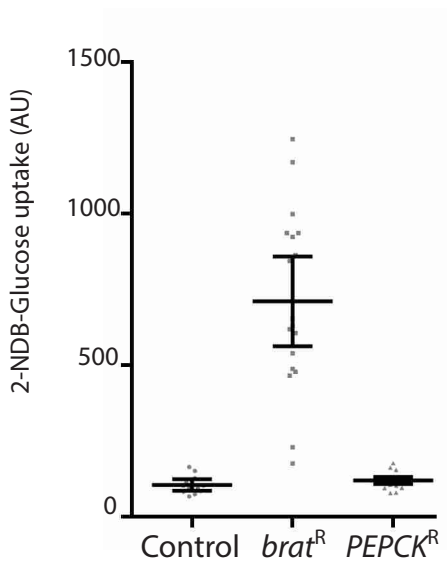

b

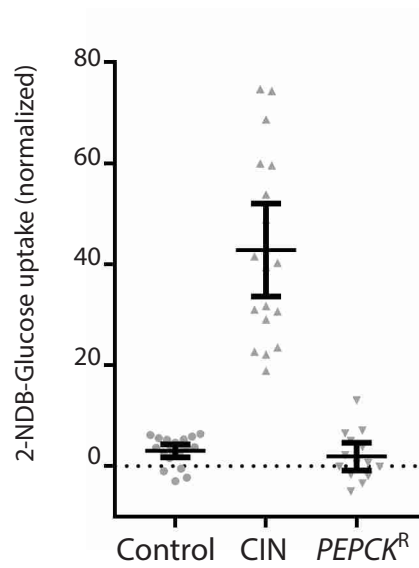

Depletion of PEPCK alone does not affect glucose uptake. (a) The uptake of fluorescently labelled 2-NDB-glucose in 3rd instar larval brains was increased by depletion of Brat (*da>Gal4; UAS-brat-RNAi*), but not altered by depletion of PEPCK (*da>Gal4; UAS-PEPCK-RNAi*). (b) The uptake of fluorescently labelled 2-NDB-glucose in the posterior half of 3rd instar larval wing discs was increased when CIN was induced by depletion of Rad21 (*en>Gal4; UAS-Rad21-RNAi; UAS-Dicer2*), but not altered by depletion of PEPCK (*en>Gal4; UAS-PEPCK-RNAi*).
